# Supplementary material for: Non-heme μ-Oxo- and bis(μ-carboxylato)-bridged diiron(iii) complexes of a 3N ligand as catalysts for alkane hydroxylation: stereoelectronic factors of carboxylate bridges determine the catalytic efficiency
Source: Royal Society of Chemistry journal article supplement (doi:10.1039/c6dt01059h), 2016-01-01
Supplement: c6dt01059h3.pdf [file c6dt01059h3.pdf]

## Supporting Information

### **$\mu$ -Oxo- and Bis( $\mu$ -carboxylato)-bridged Diiron(III) Complexes of a 3N Ligand as Catalysts for Alkane Hydroxylation: Stereoelectronic Factors of Carboxylate Bridge Determine the Catalytic Efficiency**

**Mani Balamurugan,<sup>a</sup>EringathodiSuresh,<sup>b</sup> and Mallayan Palaniandavar<sup>a\*</sup>**

<sup>a</sup>*School of Chemistry, Bharathidasan University, Tiruchirappalli - 620024, Tamil Nadu, India.*

<sup>b</sup>*Analytical Science Discipline, Central Salt and Marine Chemicals Research Institute, Bhavnagar - 364 002, India.*

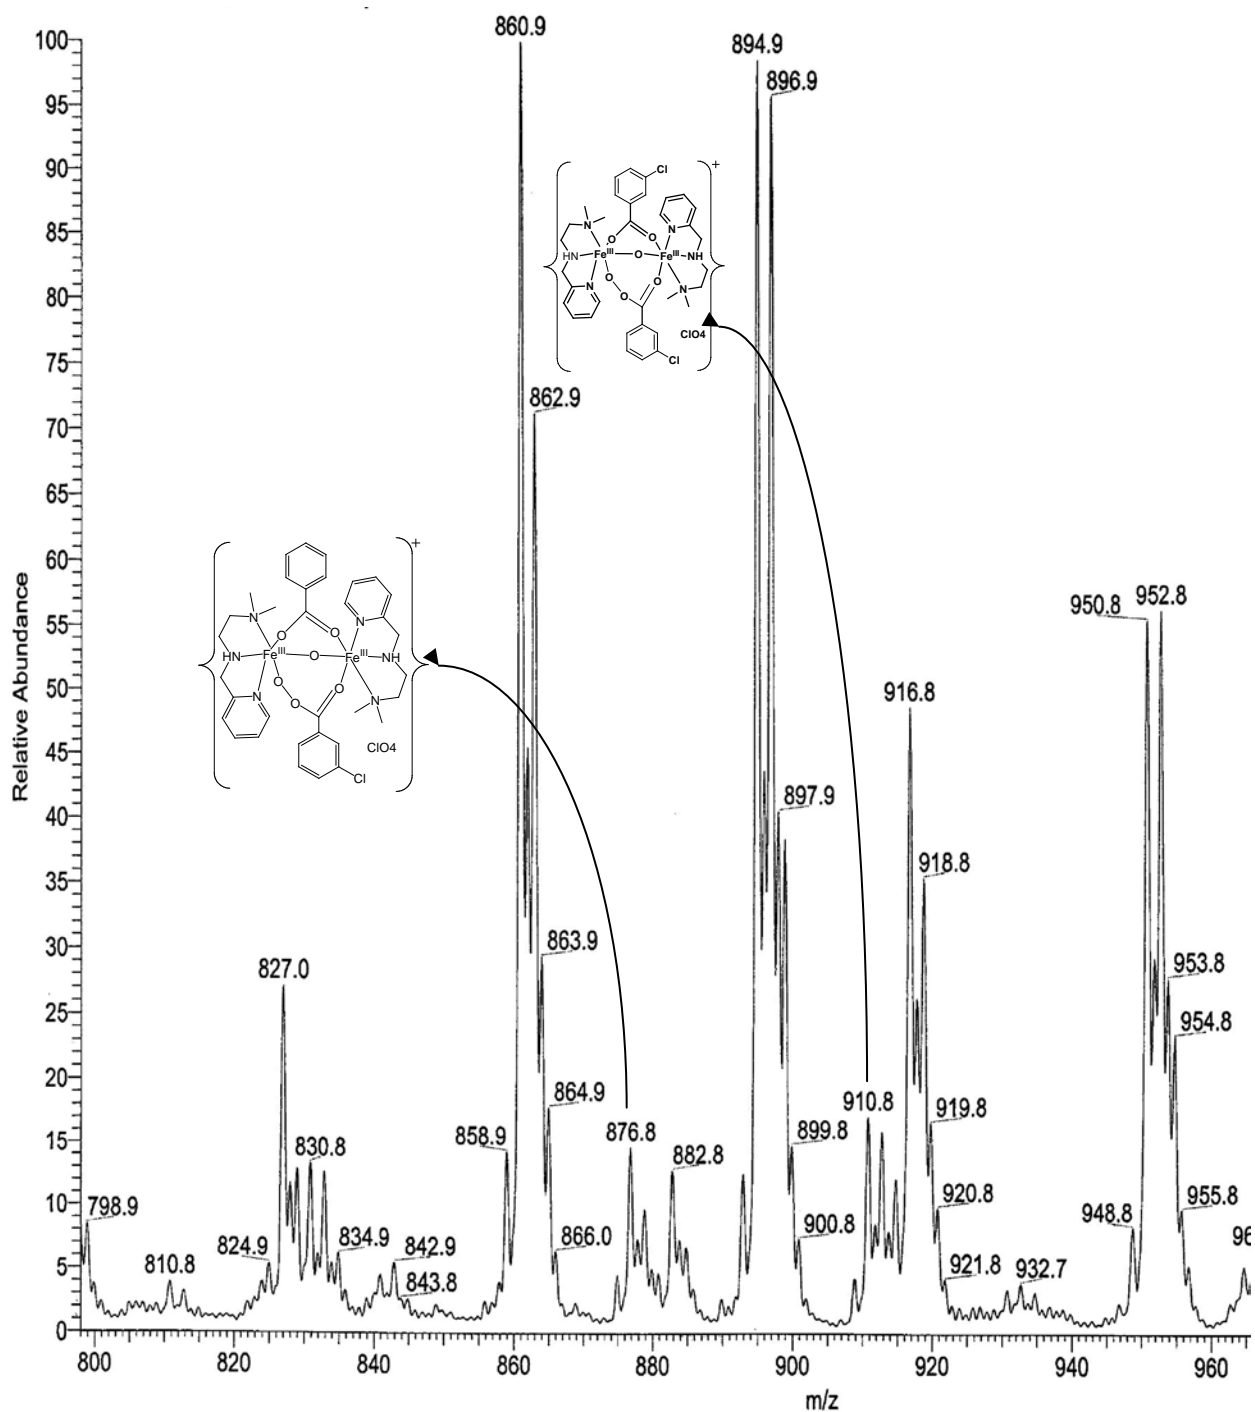

**Figure S1.** ESI-MS spectrum of the reaction of **4** with 5 eq. of *m*-CPBA and 1 eq. of TEA. Intense peak in the spectrum at  $m/z = 860.9, 894.8, 916.8$  and  $950.7$  corresponding to  $\{[\text{Fe}_2^{\text{III}}(\text{O})(\text{L})_2(\text{OBz})_2]\text{ClO}_4\}^+$ ,  $\{[\text{Fe}_2^{\text{III}}(\text{O})(\text{L})_2(\text{OBz})_2](\text{OBzCl})\}^+$ ,  $\{[\text{Fe}_2^{\text{III}}(\text{O})(\text{L})_2(\text{OBz})(\text{OBzCl})](\text{OBzCl})\}^+$  and  $\{[\text{Fe}_2^{\text{III}}(\text{O})(\text{L})_2(\text{OBzCl})_2](\text{OBzCl})\}^+$ . Less intense peaks in the spectrum are assigned to the *m*-CPBA adducts  $\{[\text{Fe}_2^{\text{III}}(\text{O})(\text{L})_2(\text{OBz})(\text{OOCOC}_6\text{H}_4\text{Cl})]\text{ClO}_4\}^+$  ( $m/z = 876.8$ ) and  $\{[\text{Fe}_2^{\text{III}}(\text{O})(\text{L})_2(\text{OBzCl})(\text{OOCOC}_6\text{H}_4\text{Cl})]\text{ClO}_4\}^+$ .

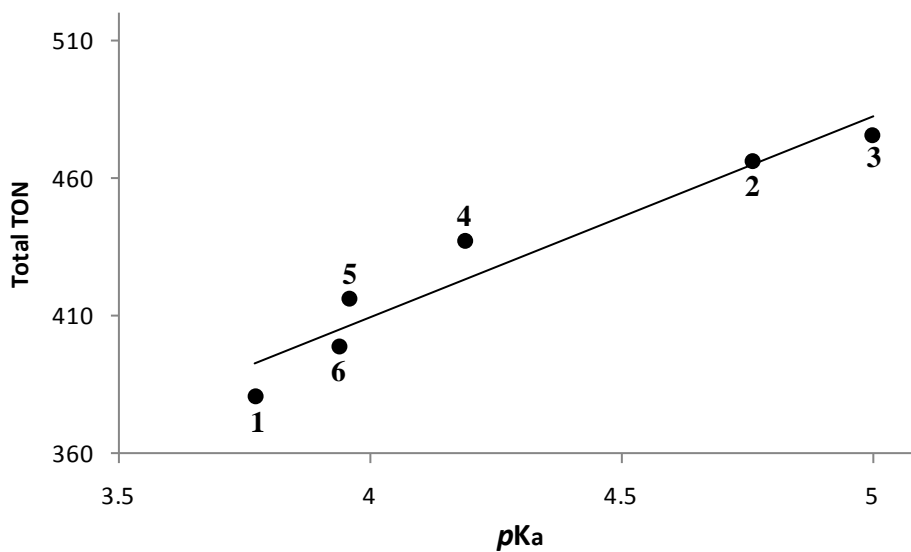

**Figure S2.** A linear correlation ( $R^2$ , 0.93) between  $pK_a$  value of bridging carboxylates and total TON of diiron(III) complexes for adamantane oxidation

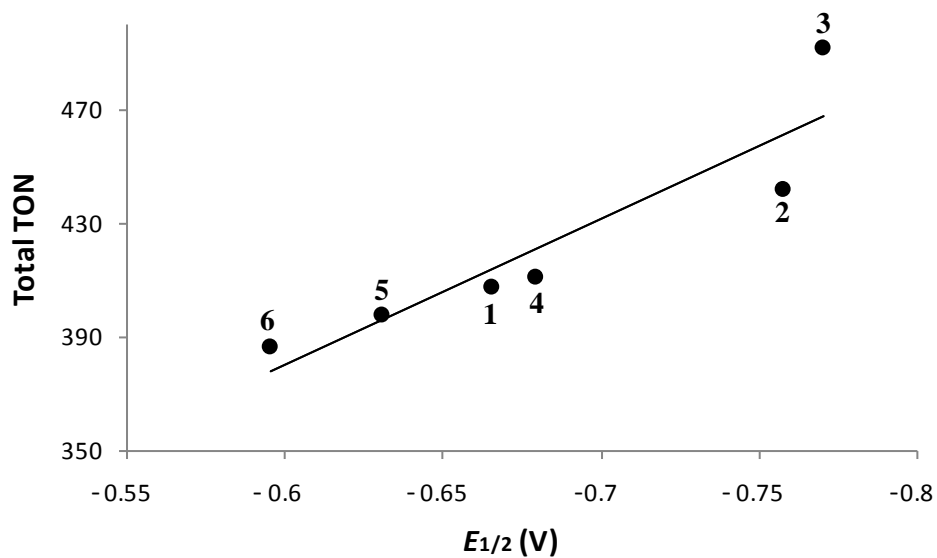

**Figure S3.** A linear correlation ( $R^2$ , 0.84) between  $E_{1/2}$  value and total TON of diiron(III) complexes for cyclohexane oxidation.

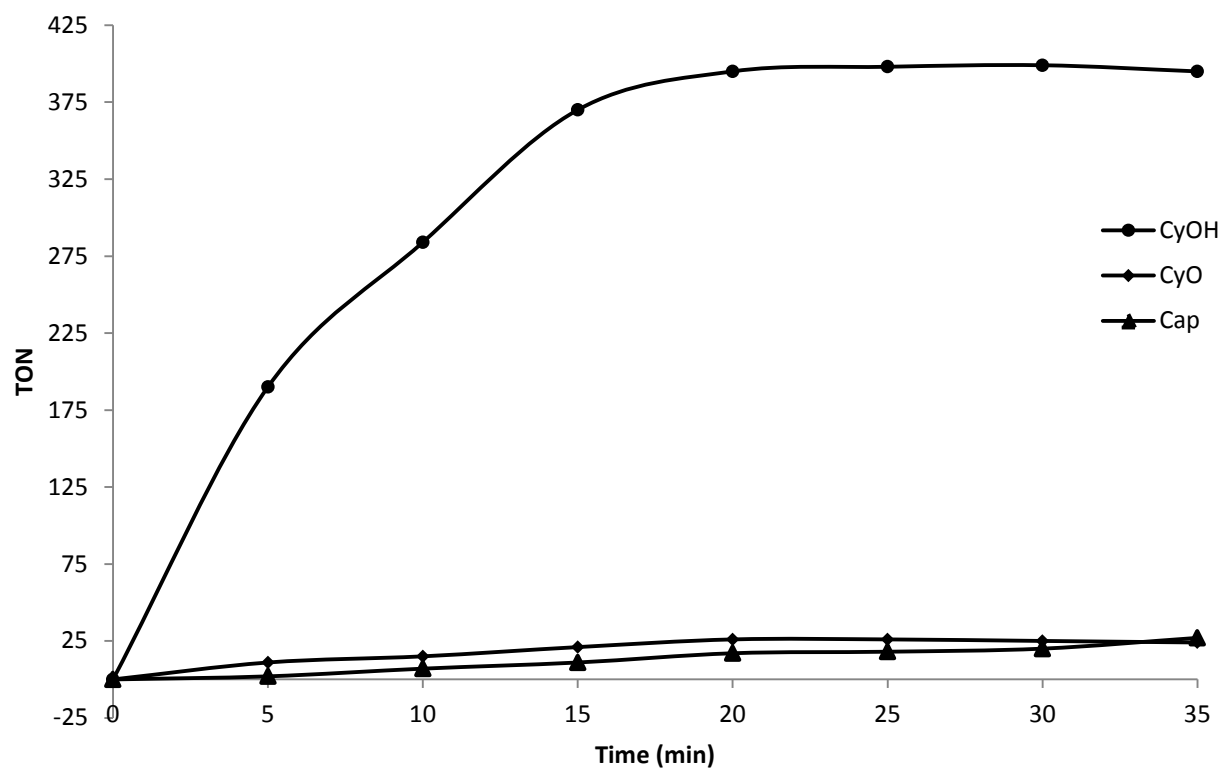

**Figure S4.** Time dependent oxidation of cyclohexane catalyzed by **2** with *m*-CPBA
